# Supplementary material for: Embracing the challenges of neonatal and paediatric pulmonary hypertension
Source: PubMed Central journal article supplement — Eur Respir J. 2024 Oct 31;64(4):2401345. doi: 10.1183/13993003.01345-2024 (PMC11525338; doi:10.1183/13993003.01345-2024), 2024-10-31
Supplement: ERJ-01345-2024.Supplement.pdf [file ERJ-01345-2024.Supplement.pdf]

**Supplement Table 1**

**Variables reported to be associated with outcome in paediatric PAH**

| Parameters                                             | References             | Unique cohorts | Reported cut off values (number of publications)                                                                                               |
|--------------------------------------------------------|------------------------|----------------|------------------------------------------------------------------------------------------------------------------------------------------------|
| <b>Clinical variables</b>                              |                        |                |                                                                                                                                                |
| *Growth (W/H z-scores)                                 | (1, 2)                 | 3              | W/H Z-score < -2 (1)                                                                                                                           |
| Age                                                    | (3-5)                  | 3              |                                                                                                                                                |
| Heart Rate (unadjusted for age)                        | (6-8)                  | 2              |                                                                                                                                                |
| Heart Rate variability                                 | (9)                    | 2              |                                                                                                                                                |
| Transcutaneous SO <sub>2</sub>                         | (10, 11)               | 2              |                                                                                                                                                |
| Blood pressure                                         | (5)                    | 1              |                                                                                                                                                |
| ECG RV hypertrophy                                     | (12)                   | 1              |                                                                                                                                                |
| Hemoptysis                                             | (13)                   | 1              |                                                                                                                                                |
| <b>Functional Variables</b>                            |                        |                |                                                                                                                                                |
| *WHO-FC                                                | (2, 3, 5, 6, 14-18)    | >3             | I-II vs III-IV (4)<br>I-III vs IV (2)                                                                                                          |
| 6MWD (>6yr)                                            | (9-11, 14)             | 3              | < 352 m (1)                                                                                                                                    |
| Pediatric FC (+/-)                                     | (19)                   | 1              |                                                                                                                                                |
| CPET (pVO <sub>2</sub> , VE/VCO <sub>2</sub> , systRR) | (20, 21)               | 1              |                                                                                                                                                |
| Physical Activity                                      | (22)                   | 1              |                                                                                                                                                |
| <b>Hemodynamic variables</b>                           |                        |                |                                                                                                                                                |
| *PVRi                                                  | (3, 14, 23-25)         | >3             | > 20 WU*m <sup>2</sup> (1)<br>> 11 WU*m <sup>2</sup> (1)<br>> 13 WU*m <sup>2</sup> (1)<br>> 6 WU*m <sup>2</sup> (1)                            |
| *mRAP                                                  | (3, 4, 10, 14, 23, 26) | >3             | >5 mmHg (1)<br>>7 mmHg (1)<br>> 10 mmHg (1)                                                                                                    |
| *Cardiac Index                                         | (14, 26)               | >3             | < 2,0 L/min/m <sup>2</sup>                                                                                                                     |
| *AVT response                                          | (14, 27, 28)           | >3             | Sitbon criteria no                                                                                                                             |
| *mPAP/mSAP                                             | (5, 18, 25, 27, 29)    | 3              | 0.76 (1)                                                                                                                                       |
| *PACi                                                  | (8, 23, 24, 30)        | 3              | < 0.7 ml/mmHg/m <sup>2</sup> (1)<br>< 0.85 ml/mmHg/m <sup>2</sup> (1)<br>< 0.9 ml/mmHg/m <sup>2</sup> (1)<br>< 1.27 ml/mmHg/m <sup>2</sup> (1) |
| mPAP                                                   | (23, 25, 31)           | 3              |                                                                                                                                                |
| Stroke volume index                                    | (8, 23)                | 2              |                                                                                                                                                |
| PVR/SVR                                                | (27, 29)               | 2              |                                                                                                                                                |
| Systemic venous SO <sub>2</sub>                        | (3)                    | 1              |                                                                                                                                                |
| Ventricular-vascular coupling                          | (25)                   | 1              |                                                                                                                                                |
| <b>Imaging variables</b>                               |                        |                |                                                                                                                                                |
| <b>ECHO</b>                                            |                        |                |                                                                                                                                                |
| *TAPSE                                                 | (6, 10, 14, 32, 33)    | >3             | <12 mm (1)<br>< 14 mm (1)<br>Z-score <-4.3 (1)S                                                                                                |
| *RVFAC                                                 | (33-35)                | >3             | <16% (1)<br><25% (1)<br><32% (1)                                                                                                               |
| *RV-Longitudinal strain                                | (35-37)                | 3              | -15% (s)/-17 (fw) (1)<br>-19% (fw) (1)<br>-14% (g) (1)                                                                                         |
| *LV-EI                                                 | (10, 33, 37)           | 3              | Systolic > 1,89                                                                                                                                |

|                                          |                            |    |                                                                     |
|------------------------------------------|----------------------------|----|---------------------------------------------------------------------|
|                                          |                            |    | Diastolic >1,55                                                     |
| RV/LV dimension ratio                    | (6, 32, 38)                | 2  | > 1 (1)                                                             |
| RA-area/volume                           | (10, 33)                   | 2  |                                                                     |
| Pericardial effusion                     | (6, 32)                    | 1  |                                                                     |
| RVEDD                                    | (10, 33)                   | 2  |                                                                     |
| RV ejection time                         | (32)                       | 1  |                                                                     |
| LV diameter                              | (10, 32)                   | 2  |                                                                     |
| RA-deformation                           | (39, 40)                   | 1  |                                                                     |
| SV/ESV (3D)                              | (41)                       | 1  |                                                                     |
| PAAT                                     | (10)                       | 1  |                                                                     |
| PV Diameter                              | (10)                       | 1  |                                                                     |
| TV Diameter                              | (10)                       | 1  |                                                                     |
| TV Velocity                              | (10)                       | 1  |                                                                     |
| MV E- and A- wave velocity               | (10)                       | 1  |                                                                     |
|                                          |                            |    |                                                                     |
| <b>MRI</b>                               |                            |    |                                                                     |
| *RVEF                                    | (7, 42, 43)                | 3  | <44% (1)                                                            |
| *RVmassi                                 | (7, 42, 43)                | 3  | >80 g/m <sup>2</sup> (1)                                            |
| RVEDVi                                   | (7, 42)                    | 2  |                                                                     |
| RVESVi                                   | (7, 43)                    | 2  |                                                                     |
| RVmass/LVmass ratio                      | (43)                       | 1  |                                                                     |
| Mid-RV Diameter index                    | (7)                        | 1  |                                                                     |
| LV-EI                                    | (43)                       | 1  |                                                                     |
| LVSVi                                    | (7)                        | 1  |                                                                     |
| RV Global functioning index              | (42)                       | 1  |                                                                     |
| Mechanical Dyssynchrony                  | (44)                       | 1  |                                                                     |
| PWV                                      | (45)                       | 1  |                                                                     |
|                                          |                            |    |                                                                     |
| <b>CT-scan</b>                           |                            |    |                                                                     |
| Fractal branching                        | (46)                       | 1  |                                                                     |
|                                          |                            |    |                                                                     |
| <b>Serum biomarkers</b>                  |                            |    |                                                                     |
| *NT-pro-BNP (BNP)                        | (6, 14, 18, 26, 31, 47-49) | >3 | NTpBNP>1200 ng/L (1)<br>NTpBNP > 300 ng/L (2)<br>BNP < 300 ng/L (1) |
| Uric Acid                                | (18, 21, 47, 50)           | 2  |                                                                     |
| IL-6                                     | (47, 51)                   | 2  |                                                                     |
| Norepinephrine                           | (6, 49)                    | 1  |                                                                     |
| SAA-4                                    | (52)                       | 1  |                                                                     |
| Apolipoproteine-A1                       | (52)                       | 1  |                                                                     |
| ST2                                      | (53)                       | 1  |                                                                     |
| Insulin-like GF                          | (54)                       | 1  |                                                                     |
| GDF15                                    | (55)                       | 1  |                                                                     |
| MPV                                      | (17)                       | 1  |                                                                     |
|                                          |                            |    |                                                                     |
| <b>Genetics</b>                          | (56-58)                    | 3  |                                                                     |
|                                          |                            |    |                                                                     |
| <b>“Risk scores”</b>                     |                            |    |                                                                     |
| “Haarman” (number of low risk variables) | (59)                       | 1  | < 10-13 low risk variables                                          |
| “Lammers” (echo: TAPSE, RA area, LVEI)   | (10)                       | 1  | RA z-score >2.9 and LVEId >1,5 and TAPSE z-score < -2,85            |
| “Reveal 2.0 +ST2”                        | (53)                       | 1  |                                                                     |
| Qian                                     | (26)                       | 1  | W z-score <-2 and WHO-FC III-IV and RV-enlargement                  |

Overview of parameters reported to be associated with outcomes in pediatric pulmonary arterial hypertension with the appropriate references, the number of unique cohorts in which the association has been established, and the published cut off values that identify patients at high risk adverse outcomes including the number of studies that have established the cut off values (in brackets). Overview may not be fully exhaustive due to lack of a systematic review. \*Prognostic parameters that were selected based on this table for the risk stratification tool.

### Supplement references

1. Ploegstra MJ, Ivy DD, Wheeler JG, Brand M, Beghetti M, Rosenzweig EB, et al. Growth in children with pulmonary arterial hypertension: a longitudinal retrospective multiregistry study. *Lancet Respir Med*. 2016;4(4):281-90.
2. Moledina S, Hislop AA, Foster H, Schulze-Neick I, Haworth SG. Childhood idiopathic pulmonary arterial hypertension: a national cohort study. *Heart*. 2010;96(17):1401-6.
3. Ploegstra MJ, Ivy DD, Beghetti M, Bonnet D, Alehan D, Ablonczy L, et al. Long-term outcome of children with newly diagnosed pulmonary arterial hypertension: results from the global TOPP registry. *Eur Heart J Qual Care Clin Outcomes*. 2024;10(1):66-76.
4. del Cerro Marín MJ, Sabaté Rotés A, Rodríguez Ogando A, Mendoza Soto A, Quero Jiménez M, Gavilán Camacho JL, et al. Assessing pulmonary hypertensive vascular disease in childhood. Data from the Spanish registry. *Am J Respir Crit Care Med*. 2014;190(12):1421-9.
5. Zijlstra WMH, Douwes JM, Rosenzweig EB, Schokker S, Krishnan U, Roofthoof MTR, et al. Survival differences in pediatric pulmonary arterial hypertension: clues to a better understanding of outcome and optimal treatment strategies. *J Am Coll Cardiol*. 2014;63(20):2159-69.
6. Ploegstra MJ, Douwes JM, Roofthoof MT, Zijlstra WM, Hillege HL, Berger RM. Identification of treatment goals in paediatric pulmonary arterial hypertension. *Eur Respir J*. 2014;44(6):1616-26.
7. Moledina S, Pandya B, Bartsota M, Mortensen KH, McMillan M, Quayam S, et al. Prognostic significance of cardiac magnetic resonance imaging in children with pulmonary hypertension. *Circ Cardiovasc Imaging*. 2013;6(3):407-14.
8. Douwes JM, Roofthoof MT, Bartelds B, Talsma MD, Hillege HL, Berger RM. Pulsatile haemodynamic parameters are predictors of survival in paediatric pulmonary arterial hypertension. *Int J Cardiol*. 2013;168(2):1370-7.
9. Lammers AE, Munnery E, Hislop AA, Haworth SG. Heart rate variability predicts outcome in children with pulmonary arterial hypertension. *Int J Cardiol*. 2010;142(2):159-65.
10. Lammers AE, Marek J, Diller GP, Haworth SG, Moledina S. Prognostic Value of Transthoracic Echocardiography in Children With Pulmonary Arterial Hypertension. *J Am Heart Assoc*. 2023;12(6):e023118.
11. Douwes JM, Hegeman AK, van der Krieke MB, Roofthoof MT, Hillege HL, Berger RM. Six-minute walking distance and decrease in oxygen saturation during the six-minute walk test in pediatric pulmonary arterial hypertension. *Int J Cardiol*. 2016;202:34-9.
12. Krämer J, Kreuzer F, Kaestner M, Bride P, von Scheidt F, Siaplaouras J, et al. Impact of the Right Ventricular Sokolow-Lyon Index in Children with Idiopathic Pulmonary Arterial Hypertension. *Pediatr Cardiol*. 2018;39(6):1115-22.
13. Roofthoof MT, Douwes JM, Vrijlandt EJ, Berger RM. Frequency and prognostic significance of hemoptysis in pediatric pulmonary arterial hypertension. *Am J Cardiol*. 2013;112(9):1505-9.
14. Ploegstra MJ, Zijlstra WMH, Douwes JM, Hillege HL, Berger RMF. Prognostic factors in pediatric pulmonary arterial hypertension: A systematic review and meta-analysis. *Int J Cardiol*. 2015;184:198-207.

15. Rosenzweig EB, Ivy DD, Widlitz A, Doran A, Claussen LR, Yung D, et al. Effects of long-term bosentan in children with pulmonary arterial hypertension. *J Am Coll Cardiol.* 2005;46(4):697-704.
16. Ivy DD, Rosenzweig EB, Lemarié JC, Brand M, Rosenberg D, Barst RJ. Long-term outcomes in children with pulmonary arterial hypertension treated with bosentan in real-world clinical settings. *Am J Cardiol.* 2010;106(9):1332-8.
17. Gu L, Li YY, Xie L, Liu HM. Idiopathic Pulmonary Arterial Hypertension and Pulmonary Arterial Hypertension Associated With Congenital Heart Disease in Chinese Children: Similarities, Differences, and Prognostic Factors. *Front Pediatr.* 2020;8:106.
18. van Loon RL, Roofthoof MT, Delhaas T, van Osch-Gevers M, ten Harkel AD, Strengers JL, et al. Outcome of pediatric patients with pulmonary arterial hypertension in the era of new medical therapies. *Am J Cardiol.* 2010;106(1):117-24.
19. Balkin EM, Olson ED, Robertson L, Adatia I, Fineman JR, Keller RL. Change in Pediatric Functional Classification During Treatment and Morbidity and Mortality in Children with Pulmonary Hypertension. *Pediatr Cardiol.* 2016;37(4):756-64.
20. Lammers AE, Diller GP, Odendaal D, Taylor S, Derrick G, Haworth SG. Comparison of 6-min walk test distance and cardiopulmonary exercise test performance in children with pulmonary hypertension. *Arch Dis Child.* 2011;96(2):141-7.
21. Rausch CM, Taylor AL, Ross H, Sillau S, Ivy DD. Ventilatory efficiency slope correlates with functional capacity, outcomes, and disease severity in pediatric patients with pulmonary hypertension. *Int J Cardiol.* 2013;169(6):445-8.
22. Zijlstra WMH, Ploegstra MJ, Vissia-Kazemier T, Roofthoof MTR, Sarvaas GDM, Bartelds B, et al. Physical Activity in Pediatric Pulmonary Arterial Hypertension Measured by Accelerometry. A Candidate Clinical Endpoint. *Am J Respir Crit Care Med.* 2017;196(2):220-7.
23. Grynblat J, Malekzadeh-Milani SG, Meot M, Perros F, Szezepanski I, Morisset S, et al. Monitoring of Hemodynamics With Right Heart Catheterization in Children With Pulmonary Arterial Hypertension. *J Am Heart Assoc.* 2023;12(7):e029085.
24. Sajan I, Manlhiot C, Reyes J, McCrindle BW, Humpl T, Friedberg MK. Pulmonary arterial capacitance in children with idiopathic pulmonary arterial hypertension and pulmonary arterial hypertension associated with congenital heart disease: relation to pulmonary vascular resistance, exercise capacity, and survival. *Am Heart J.* 2011;162(3):562-8.
25. Dufva MJ, Ivy D, Campbell K, Lam A, Rauff A, Breeman KTN, et al. Ventricular-vascular coupling is predictive of adverse clinical outcome in paediatric pulmonary arterial hypertension. *Open Heart.* 2021;8(2).
26. Qian Y, Quan R, Chen X, Gu Q, Xiong C, Han H, et al. Characteristics, Long-term Survival, and Risk Assessment of Pediatric Pulmonary Arterial Hypertension in China: Insights From a National Multicenter Prospective Registry. *Chest.* 2023;163(6):1531-42.
27. Douwes JM, van Loon RL, Hoendermis ES, Vonk-Noordegraaf A, Roofthoof MT, Talsma MD, et al. Acute pulmonary vasodilator response in paediatric and adult pulmonary arterial hypertension: occurrence and prognostic value when comparing three response criteria. *Eur Heart J.* 2011;32(24):3137-46.
28. Douwes JM, Humpl T, Bonnet D, Beghetti M, Ivy DD, Berger RM. Acute Vasodilator Response in Pediatric Pulmonary Arterial Hypertension: Current Clinical Practice From the TOPP Registry. *J Am Coll Cardiol.* 2016;67(11):1312-23.
29. Barst RJ, McGoon MD, Elliott CG, Foreman AJ, Miller DP, Ivy DD. Survival in childhood pulmonary arterial hypertension: insights from the registry to evaluate early and long-term pulmonary arterial hypertension disease management. *Circulation.* 2012;125(1):113-22.
30. Takatsuki S, Nakayama T, Ikehara S, Matsuura H, Ivy DD, Saji T. Pulmonary Arterial Capacitance Index Is a Strong Predictor for Adverse Outcome in Children with Idiopathic and Heritable Pulmonary Arterial Hypertension. *J Pediatr.* 2017;180:75-9.e2.

31. Miyamoto K, Inai K, Kobayashi T, Maeda J, Takatsuki S, Nakayama T, et al. Outcomes of idiopathic pulmonary arterial hypertension in Japanese children: a retrospective cohort study. *Heart Vessels*. 2021;36(9):1392-9.
32. Ploegstra MJ, Roofthoof MT, Douwes JM, Bartelds B, Elzenga NJ, van de Weerd D, et al. Echocardiography in pediatric pulmonary arterial hypertension: early study on assessing disease severity and predicting outcome. *Circ Cardiovasc Imaging*. 2015;8(1).
33. Kassem E, Humpl T, Friedberg MK. Prognostic significance of 2-dimensional, M-mode, and Doppler echo indices of right ventricular function in children with pulmonary arterial hypertension. *Am Heart J*. 2013;165(6):1024-31.
34. Kumar S, Vadlamudi K, Kaddoura T, Bobhate P, Goot BH, Elgendi M, et al. Active right atrial emptying fraction predicts reduced survival and increased adverse events in childhood pulmonary arterial hypertension. *Int J Cardiol*. 2018;271:306-11.
35. Jone PN, Schäfer M, Pan Z, Bremen C, Ivy DD. 3D echocardiographic evaluation of right ventricular function and strain: a prognostic study in paediatric pulmonary hypertension. *Eur Heart J Cardiovasc Imaging*. 2018;19(9):1026-33.
36. Okumura K, Humpl T, Dragulescu A, Mertens L, Friedberg MK. Longitudinal assessment of right ventricular myocardial strain in relation to transplant-free survival in children with idiopathic pulmonary hypertension. *J Am Soc Echocardiogr*. 2014;27(12):1344-51.
37. Muntean I, Benedek T, Melinte M, Suteu C, Togănel R. Deformation pattern and predictive value of right ventricular longitudinal strain in children with pulmonary arterial hypertension. *Cardiovasc Ultrasound*. 2016;14(1):27.
38. Jone PN, Hinzman J, Wagner BD, Ivy DD, Younoszai A. Right ventricular to left ventricular diameter ratio at end-systole in evaluating outcomes in children with pulmonary hypertension. *J Am Soc Echocardiogr*. 2014;27(2):172-8.
39. Jone PN, Schäfer M, Li L, Craft M, Ivy DD, Kutty S. Right Atrial Deformation in Predicting Outcomes in Pediatric Pulmonary Hypertension. *Circ Cardiovasc Imaging*. 2017;10(12).
40. Frank BS, Schafer M, Thomas TM, Haxel C, Ivy DD, Jone PN. Right Atrial Conduit Phase Emptying Predicts Risk of Adverse Events in Pediatric Pulmonary Arterial Hypertension. *J Am Soc Echocardiogr*. 2020;33(8):1006-13.
41. Jone PN, Schäfer M, Pan Z, Ivy DD. Right Ventricular-Arterial Coupling Ratio Derived From 3-Dimensional Echocardiography Predicts Outcomes in Pediatric Pulmonary Hypertension. *Circ Cardiovasc Imaging*. 2019;12(1):e008176.
42. Ta HT, Critser PJ, Schäfer M, Ollberding NJ, Taylor MD, Di Maria MV, et al. Ventricular global function index is associated with clinical outcomes in pediatric pulmonary hypertension. *J Cardiovasc Magn Reson*. 2023;25(1):39.
43. Haarman MG, Coenraad I, Hagdorn QAJ, Hillege HL, Willems TP, Berger RMF, Douwes JM. Cardiac Magnetic Resonance Derived Left Ventricular Eccentricity Index and Right Ventricular Mass Measurements Predict Outcome in Children with Pulmonary Arterial Hypertension. *Children (Basel)*. 2023;10(4).
44. Frank BS, Schäfer M, Douwes JM, Ivy DD, Abman SH, Davidson JA, et al. Novel measures of left ventricular electromechanical discoordination predict clinical outcomes in children with pulmonary arterial hypertension. *Am J Physiol Heart Circ Physiol*. 2020;318(2):H401-h12.
45. Friesen RM, Schäfer M, Ivy DD, Abman SH, Stenmark K, Browne LP, et al. Proximal pulmonary vascular stiffness as a prognostic factor in children with pulmonary arterial hypertension. *Eur Heart J Cardiovasc Imaging*. 2019;20(2):209-17.
46. Moledina S, de Bruyn A, Schievano S, Owens CM, Young C, Haworth SG, et al. Fractal branching quantifies vascular changes and predicts survival in pulmonary hypertension: a proof of principle study. *Heart*. 2011;97(15):1245-9.
47. Duncan M, Wagner BD, Murray K, Allen J, Colvin K, Accurso FJ, Ivy DD. Circulating cytokines and growth factors in pediatric pulmonary hypertension. *Mediators Inflamm*. 2012;2012:143428.

48. Said F, Haarman MG, Roofthoof MTR, Hillege HL, Ploegstra MJ, Berger RMF. Serial Measurements of N-Terminal Pro-B-Type Natriuretic Peptide Serum Level for Monitoring Pulmonary Arterial Hypertension in Children. *J Pediatr*. 2020;220:139-45.
49. Van Albada ME, Loot FG, Fokkema R, Roofthoof MT, Berger RM. Biological serum markers in the management of pediatric pulmonary arterial hypertension. *Pediatr Res*. 2008;63(3):321-7.
50. Leberkühne LJ, Ploegstra MJ, Douwes JM, Bartelds B, Roofthoof MT, Hillege HL, Berger RM. Serially Measured Uric Acid Levels Predict Disease Severity and Outcome in Pediatric Pulmonary Arterial Hypertension. *Am J Respir Crit Care Med*. 2017;195(3):401-4.
51. Chen JY, Griffiths M, Yang J, Nies MK, Damico RL, Simpson CE, et al. Elevated Interleukin-6 Levels Predict Clinical Worsening in Pediatric Pulmonary Arterial Hypertension. *J Pediatr*. 2020;223:164-9.e1.
52. Yeager ME, Colvin KL, Everett AD, Stenmark KR, Ivy DD. Plasma proteomics of differential outcome to long-term therapy in children with idiopathic pulmonary arterial hypertension. *Proteomics Clin Appl*. 2012;6(5-6):257-67.
53. Griffiths M, Yang J, Simpson CE, Vaidya D, Nies M, Brandal S, et al. ST2 Is a Biomarker of Pediatric Pulmonary Arterial Hypertension Severity and Clinical Worsening. *Chest*. 2021;160(1):297-306.
54. Griffiths M, Yang J, Nies M, Vaidya D, Brandal S, Williams M, et al. Pediatric pulmonary hypertension: insulin-like growth factor-binding protein 2 is a novel marker associated with disease severity and survival. *Pediatr Res*. 2020;88(6):850-6.
55. Li G, Li Y, Tan XQ, Jia P, Zhao J, Liu D, et al. Plasma Growth Differentiation Factor-15 is a Potential Biomarker for Pediatric Pulmonary Arterial Hypertension Associated with Congenital Heart Disease. *Pediatr Cardiol*. 2017;38(8):1620-6.
56. Xu Z, Zhang H, Zhang C, Li Q, Gu H. Association between Genotype, Presentation, and Outcome in Childhood Idiopathic and Hereditary Pulmonary Arterial Hypertension. *J Clin Med*. 2022;11(24).
57. Haarman MG, Kerstjens-Frederikse WS, Vissia-Kazemier TR, Breeman KTN, Timens W, Vos YJ, et al. The Genetic Epidemiology of Pediatric Pulmonary Arterial Hypertension. *J Pediatr*. 2020;225:65-73.e5.
58. Levy M, Eyries M, Szezepanski I, Ladouceur M, Nadaud S, Bonnet D, Soubrier F. Genetic analyses in a cohort of children with pulmonary hypertension. *Eur Respir J*. 2016;48(4):1118-26.
59. Haarman MG, Douwes JM, Ploegstra MJ, Roofthoof MTR, Vissia-Kazemier TR, Hillege HL, Berger RMF. The Clinical Value of Proposed Risk Stratification Tools in Pediatric Pulmonary Arterial Hypertension. *Am J Respir Crit Care Med*. 2019;200(10):1312-5.
